# Supplementary material
Source: PubMed Central journal article supplement (PMC3322833)
Supplement: supp_M111.328187_jbc.M111.328187-1.pdf [file supp_M111.328187_jbc.M111.328187-1.pdf]

## **Supplementary Figure Legends**

### **Supplementary Figure 1. Mapping interacting domain between TRAF6 and USP4.**

(A, B) Immunoprecipitation (IP) and immunoblot (IB) of cell lysates from HEK293T cells transfected with expression plasmids as indicated. USP4 C-terminal USP domain is sufficient and needed for TRAF6 interaction. Within TRAF6, TRAF domain, but not the Ring Finger or Zinc Finger domain, interacted with USP4. Flag TRAF6 150-350 is expressed at lower levels than other TRAF6 constructs. However, long to very long exposure of Myc blot (top panel in (C), did not reveal any signal in the TRAF6 150-350 lane. (C), Schematic representation of the deletion mutants of TRAF6 and USP4 that were used in this study. USP4: N-ter, N-terminal domain of USP4, C-ter, C-terminal domain of USP4. Traf6: 1-150 that contains Ring Finger, 150-350 that contains Zinc Finger, and 350-522 that contains TRAF domain.

A

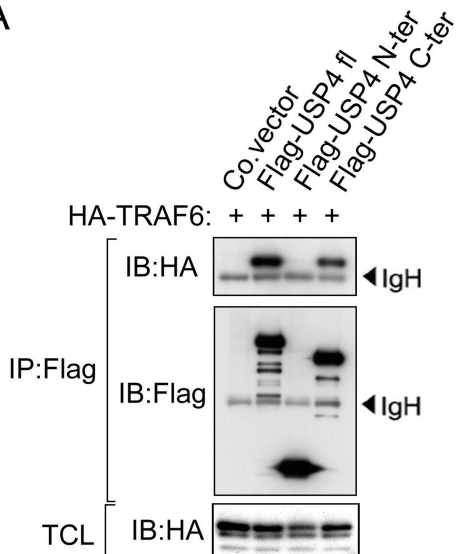

B

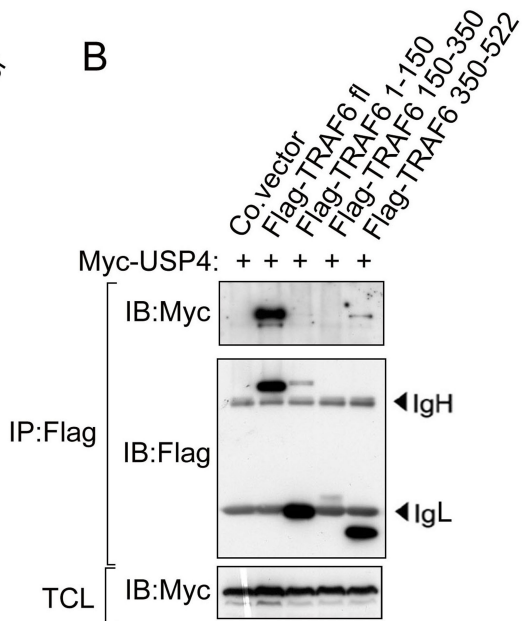

C

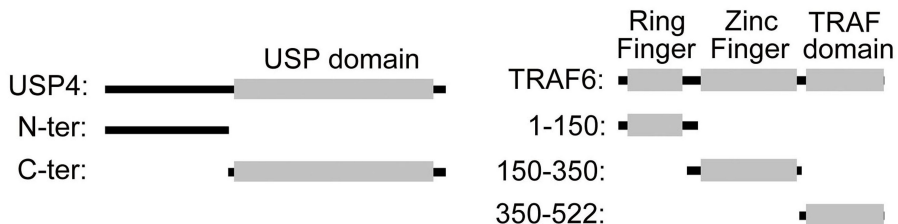

Supplementary Figure 1

## Supplementary Table 1

mTNF- $\alpha$  forward, 5'- CAGCCTCTTCTCATTCCTGC-3'

mTNF- $\alpha$  reverse, 5'- AGGGTCTGGGCCATAGAAGT-3'

mIL6 forward, 5'- ACCACTTCACAAGTCGGAGG-3'

mIL6 reverse, 5'- CAGAATTGCCATTGCACAAC-3'

mNOS2 forward, 5'- AGACCTCAACAGAGCCCTCA-3'

mNOS2 reverse, 5'- GGCTGGACTTTTCACTCTGC-3'

mIL-1 $\beta$  forward, 5'- CGACAAAATACCTGTGGCCT-3'

mIL-1 $\beta$  reverse, 5'- TTCTTTGGGTATTGCTTGGG-3'

mGAPDH forward, 5'-AACTTTGGCATTGTGGAAGG-3'

mGAPDH reverse, 5'-ACACATTGGGGGTAGGAACA-3'

ztnfa forward, 5'-AGGACCAGGCCTTTTCTTCAG -3'

ztnfa reverse, 5'-AATGCCATCATCGGGAATGA -3'

ztnfb forward, 5'- CATGGTGACCCTTCAGGAC-3'

ztnfb reverse, 5'- AGGCCGCCCTGTTGGA -3'

zil1 forward, 5'-CGCAGCGGCGGATCT -3'

zil1 reverse, 5'-GCACTGGGCGACGCATAT -3'

zU4full forward, 5'-ATGGCGGAGGAGGCGGACC-3' and

zU4full reverse, 5'-TCAGTTGGTGTCCATGTGGTC-3'.

*usp4* splicing blocker, 5'-  
TGAACATCTTTGTATACCTGGAGGG-3' and mismatch  
control, 5'-TCAAGATGTTTCTATACCTGGAGGG-3'

zU4 forward, 5'- GGGAAGTTACAACTCGTACAGCT-3' and

zU4 reverse, 5'- GCCTCCGCAATCTCTCCTCTCATC-3'
